# Supplementary material
Source: publisher figshare collection journal article supplement (https://acs.figshare.com/ndownloader/files/12904718)
Supplement: Supplementary file 1 [file 12904718]

## Supporting Information

### Two-Step Solvent On-Film Annealing (2-SOFA)

### Method: Fabrication of Anisotropic Polymer Particles and Implications for Colloidal Self-Assembly

Hsiao-Fan Tseng,<sup>1</sup> Yu-Jing Chiu,<sup>1,2</sup> Bo-Hao Wu,<sup>1</sup> Jia-Wei Li,<sup>1</sup> and Jiun-Tai Chen<sup>1,2,3\*</sup>

<sup>1</sup>*Department of Applied Chemistry, National Chiao Tung University, Hsinchu, Taiwan 30010*

<sup>2</sup>*Sustainable Chemical Science and Technology, Taiwan International Graduate Program, Academia Sinica and National Chiao Tung University, Hsinchu, Taiwan 30010*

<sup>3</sup>*Center for Emergent Functional Matter Science, National Chiao Tung University, Hsinchu, Taiwan 30010*

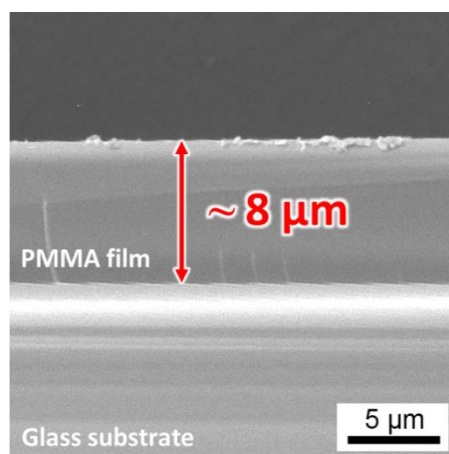

**Figure S1.** SEM images of a PMMA film spin-coated on a glass substrate. The thickness of the PMMA film is ~8 μm.

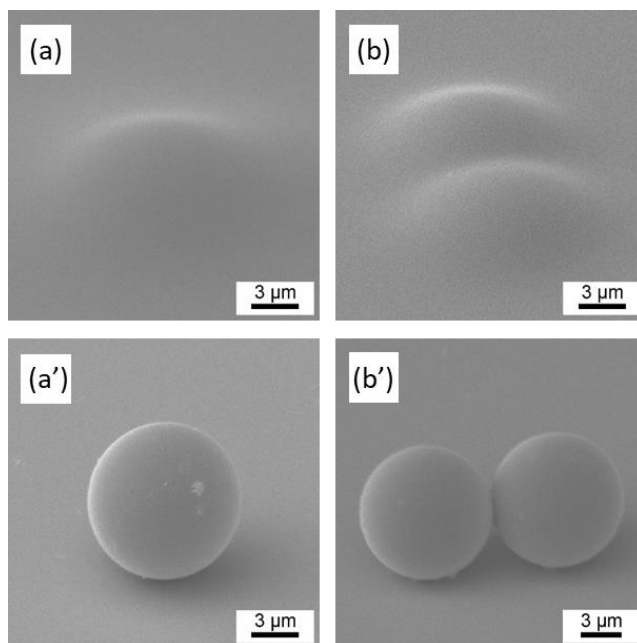

**Figure S2.** (a, b) SEM images of the PS/PMMA composites. The samples, in which the PS particles are completely covered by the PMMA films, are annealed first in acetic acid vapors for 12 h and then in cyclohexane vapors for 12 h. (a', b') SEM images of PS microspheres after the PMMA films are removed by acetic acid.

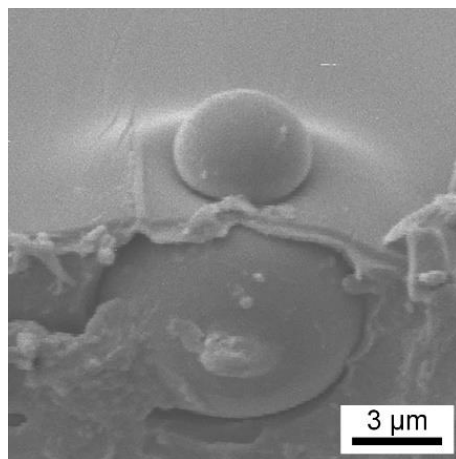

**Figure S3.** SEM image of a snowman-shaped PS particle embedded in a PMMA film after the sample is annealed first in acetic acid vapors for 24 h and then in cyclohexane vapors for 12 h.
